# Supplementary material
Source: HighWire-hosted journal article supplement (https://www.highwirestage.com/highwire/filestream/52648/field_highwire_adjunct_files/0/14-00788.pdf)
Supplement: 14-00788.pdf [file 14-00788.pdf]

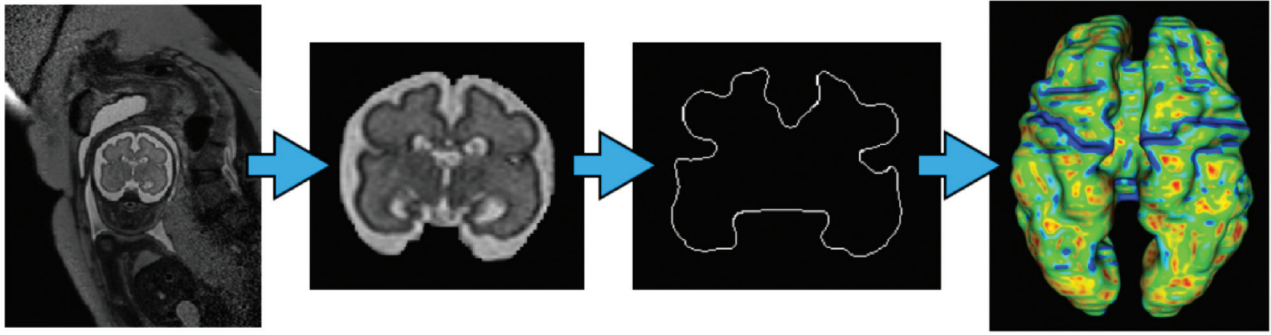

**ON-LINE FIG 1.** The flowchart of the proposed pipeline. From left to right: raw MR image, extracted intracranial region, manually segmented inner cortical surface, and 3D rendering of the cortex overlaid with a curvature-based folding measure (ie, average curvedness).

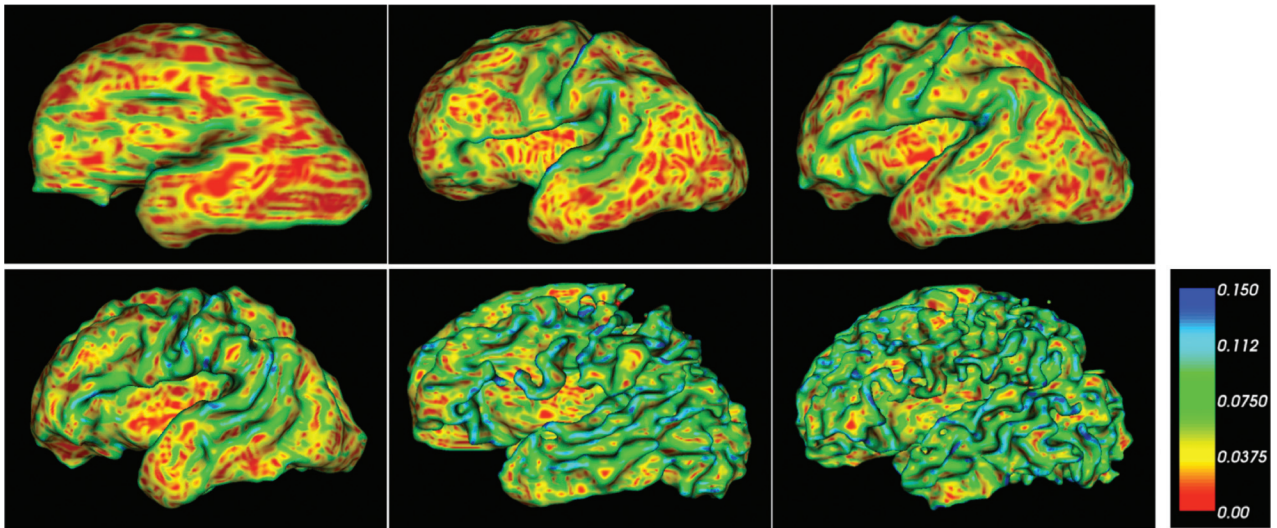

**ON-LINE FIG 2.** 3D cortical surface reconstruction overlaid with a color map of the folding measure, AC, from 6 different fetuses with various GAs. Brain size has been normalized, and the measure value has been truncated for better visualization.

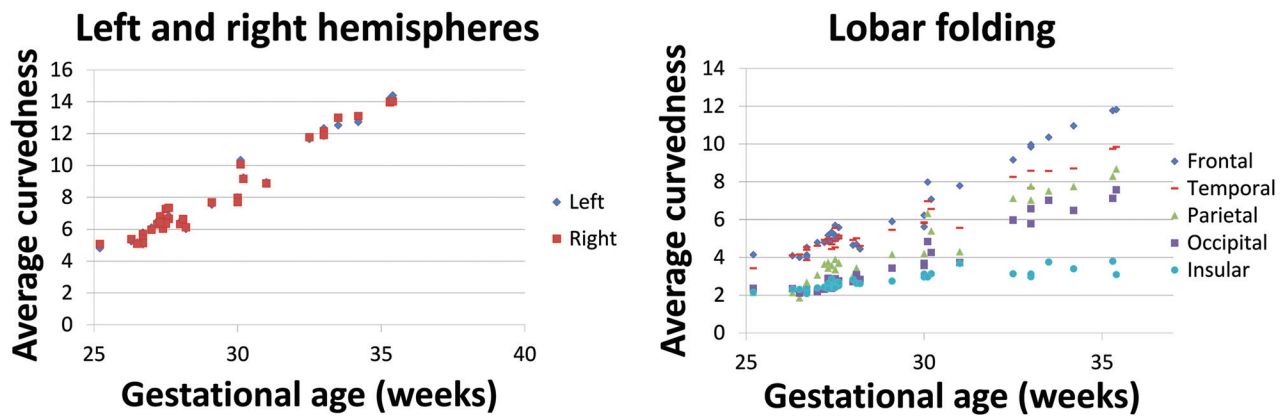

**ON-LINE FIG 3.** The left plot shows the AC for left and right cerebral hemispheres of each subject. The right plot shows the regional lobar average curvedness for each subject. The unit of AC is  $0.45 \text{ mm}^{-1}$ .

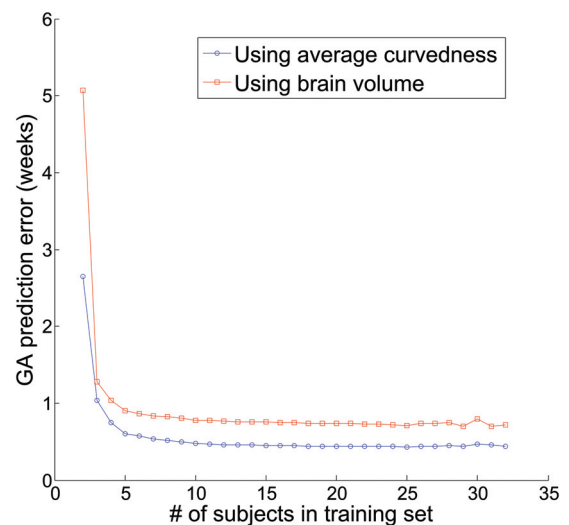

**ON-LINE FIG 4.** The change of GA prediction accuracy over a different-sized training set by using brain volume or average curvedness as a predictor. When the training set is  $>10$ , SDs (not shown for the sake of clarity) for the prediction error are approximately 0.36 for the AC predictor and 0.63 for the brain volume predictor.
